# Supplementary material for: Structures and implications of the nuclease domain of human parvovirus B19 NS1 protein
Source: PubMed Central journal article supplement (PMC9440244; doi:10.1016/j.csbj.2022.08.047), 2022-08-27
Supplement: mmc1.pdf [file mmc1.pdf]

# *Supporting Information*

*For*

## Structures and implications of the nuclease domain of human parvovirus B19 NS1 protein

Yixi Zhang<sup>1</sup>, Zhiwei Shao<sup>1</sup>, Yanqing Gao<sup>1</sup>, Boming Fan<sup>1</sup>, Jie Yang<sup>1</sup>, Xi Chen<sup>1</sup>, Xin Zhao<sup>1</sup>, Qiyuan Shao<sup>1</sup>, Weizhen Zhang<sup>1</sup>, Chulei Cao<sup>1</sup>, Hehua Liu<sup>1</sup>, Jianhua Gan<sup>1,\*</sup>

<sup>1</sup>Shanghai Public Health Clinical Center, State Key Laboratory of Genetic Engineering, Collaborative Innovation Center of Genetics and Development, Department of Biochemistry and Biophysics, School of Life Sciences, Fudan University, Shanghai 200438, China.

\*Correspondence to: [ganjhh@fudan.edu.cn](mailto:ganjhh@fudan.edu.cn)

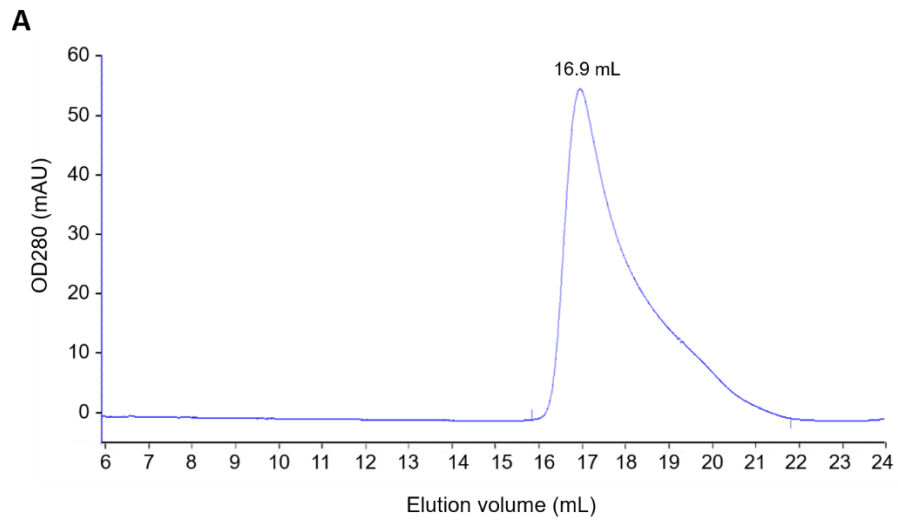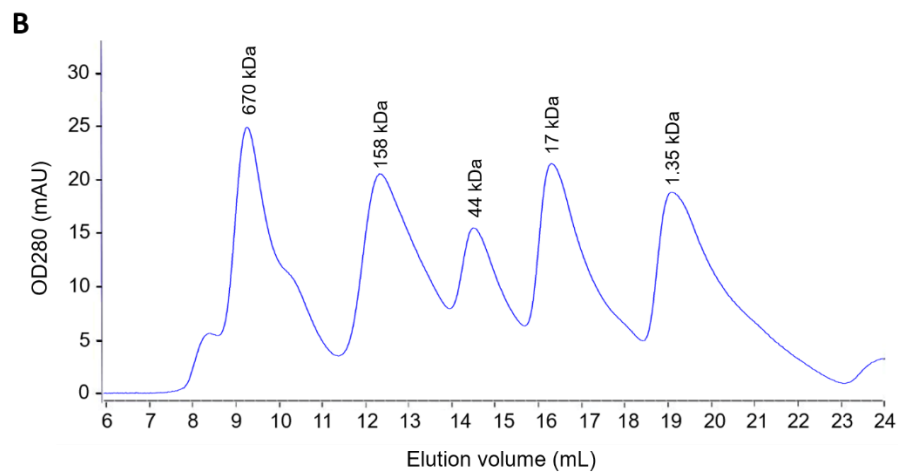

**Supplementary Fig. S1.** Size-exclusion analysis of **(A)** the NS1\_Nuc protein and **(B)** the standard marker protein on Superdex 200 Increase 10/300 GL column.

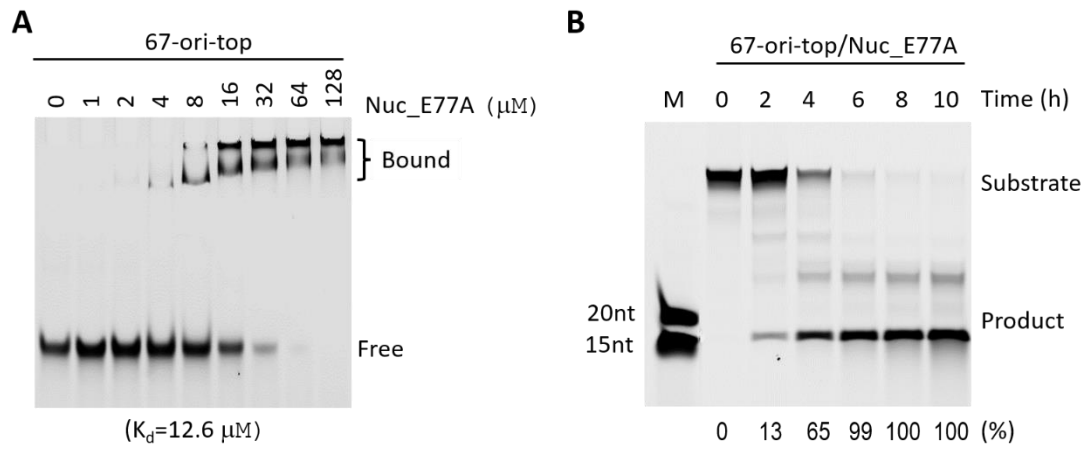

**Supplementary Fig. S2.** *In vitro* DNA binding (**A**) and cleavage (**B**) by E77A mutant of NS1\_Nuc. The  $K_d$  value and substrate cleavage percentage derived from three independent experiments are listed at the bottom of the figures.

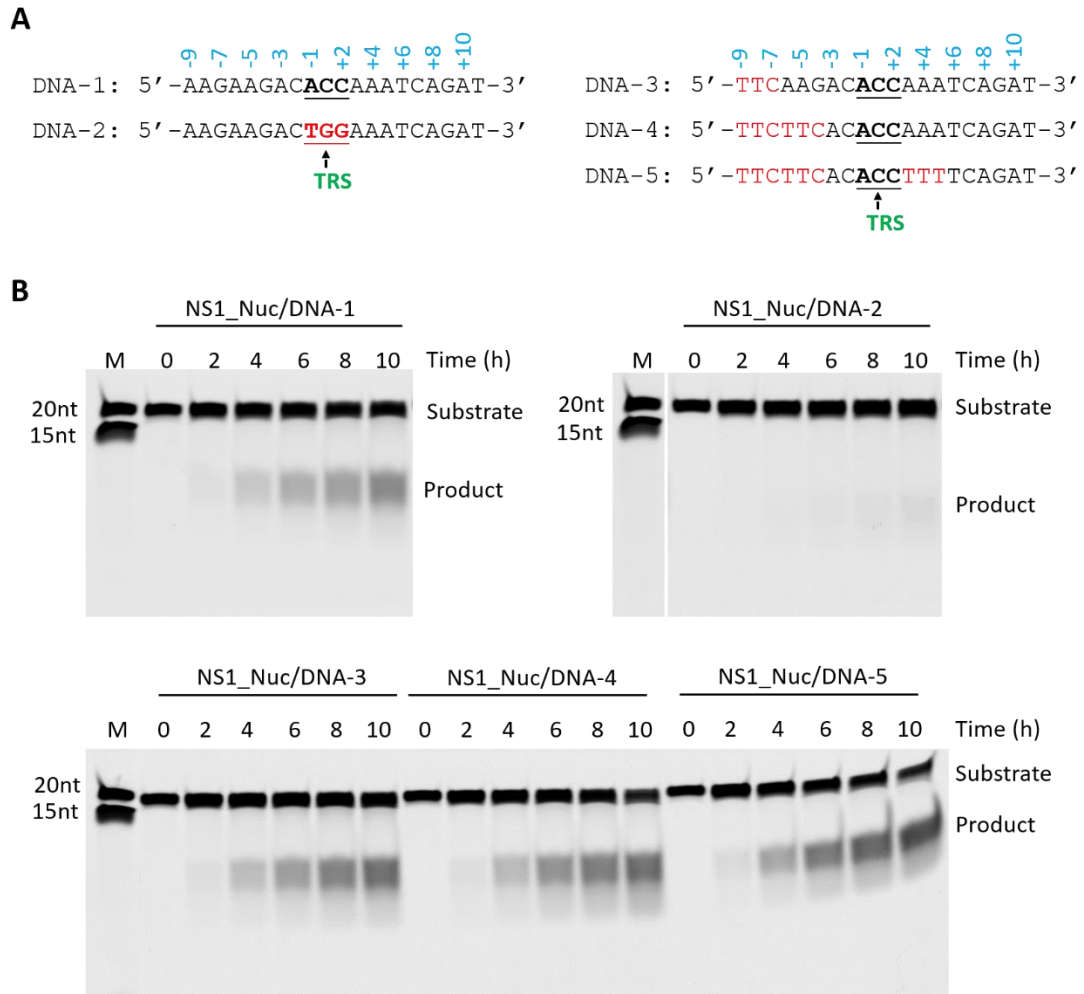

**Supplementary Fig. S3.** Impacts of DNA mutation on cleavage by NS1-Nuc. (A) Detailed sequence of the DNA variants. (B) *In vitro* DNA cleavage assays catalyzed by WT NS1\_Nuc.

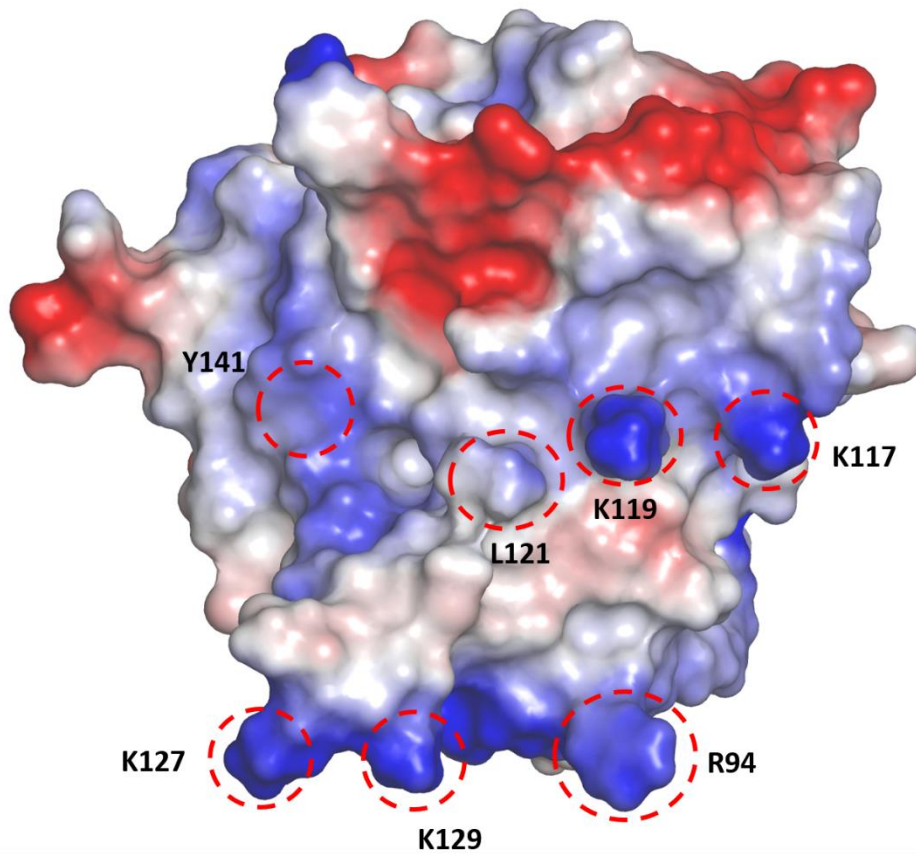

**Supplementary Fig. S4.** Surface presentation of NS1-Nuc. The residues mutated in this study are highlighted by red circles. The electrostatic surface is calculated by Pymol with the default settings.

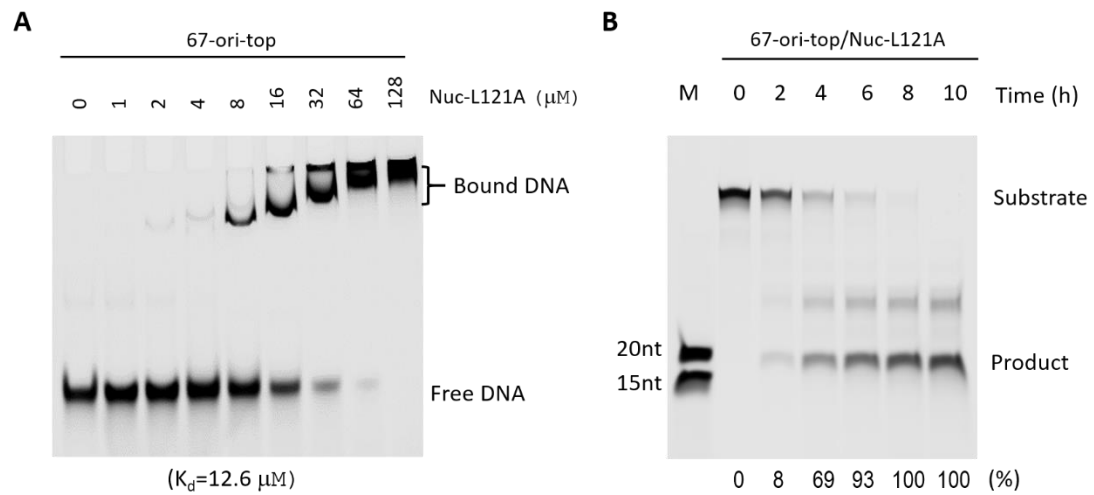

**Supplementary Fig. S5.** *In vitro* DNA binding (A) and cleavage (B) by L121A mutant of NS1\_Nuc. The  $K_d$  value and substrate cleavage percentage derived from three independent experiments are listed at the bottom of the figures.

**Supplementary Table S1.** Codon optimized cDNA sequence of NS1\_Nuc (aa 2-176)

The optimized cDNA sequence of NS1\_Nuc (from 5' to 3') <sup>a,b</sup>

**GGATCC****GGCGCGGT**GAACTGTTTCGCGGCGTGTTACAGGTGAGTAGCAATGTGCT  
GGATTGTGCCAATGATAATTGGTGGTGTAGCCTGCTCGACCTGGATACCAGCGATT  
GGGAACCGTTAACCATAACAAATCGCCTCATGGCCATTTATCTGTCAAGCGTTGCA  
AGTAAACTGGATTTTACCGGCGGTCCGTTAGCAGGTTGTCTGTATTTTTTTCAGGT  
GGAATGTAATAAATTTGAAGAAGGCTATCATATTCATGTGGTGATTGGCGGTCCGG  
GTCTGAATCCGCGCAATCTGACCGTTTGTGTGGAAGGCTTATTTAATAATGTGCTG  
TATCATTTAGTGACCGGCAATGTTAAACTGAAATTTCTGCCGGGTATGACCACCAA  
AGGTAAATATTTTCGCGATGGCGAACAGTTTATTGAAAATTATCTGATGAAAAAAA  
TTCCGCTGAATGTTGTTGGTGTGTGACCAATATTGATGGCTATATTGATACCTGT  
ATTAGCGCAACCTTTCGTCGCGGCGCCTGTCATGCCTAA**CTCGAG**

<sup>a</sup>: **GGATCC** and **CTCGAG** at the 5'-end and 3'-end are Bam HI and Xho I recognition sequence.

<sup>b</sup> **GGCGCGGT**, which codes for three Gly residues, was designed to enhance the cleavage efficiency of the UIP1 protease.

**Supplementary Table S2.** Primers used for NS1\_Nuc mutant construction.

| Name        | Sequence (from 5' to 3')                   |
|-------------|--------------------------------------------|
| NS1-Nuc_F   | GGATCCGGCGGCGGTTGAACTGTTTCGCGGCGTGTACAGGTG |
| NS1-Nuc_R   | CTCGAGTTAGGCATGACAGGCGCCGCGACGA            |
| E77A_F      | GTGGAATGTAATAAATTTGCAGAAGGCTATCATATT       |
| E77A_R      | ATGAATATGATAGCCTTCTGCAAATTTATTACATTC       |
| R94A_F      | CCGGGTCTGAATCCGGCAAATCTGACCGTTTGT          |
| R94A_R      | ACAAACGGTCAGATTTGCCGGATTCAGACCCGG          |
| K117A_F     | TTAGTGACCGGCAATGTTGCCCTGAAATTTCTGCCG       |
| K117A_R     | ACCCGGCAGAAATTTCAGGGCAACATTGCCGGTCAC       |
| K119A_F     | ACCGGCAATGTTAAACTGGCCTTTCTGCCGGGTATG       |
| K119A_R     | GGTCATACCCGGCAGAAAGGCCAGTTTAACATTGCC       |
| K117/119A_F | GTGACCGGCAATGTTGCCCTGGCCTTTCTGCCGGGTATG    |
| K117/119A_R | CATACCCGGCAGAAAGGCCAGGGCAACATTGCCGGTCAC    |
| L121A_F     | AATGTTAAACTGAAATTTGCACCGGGTATGACCACC       |
| L121A_R     | TTTGGTGGTCATACCCGGTGCAAATTTTCAGTTTAAC      |
| K127/129A_F | CCGGGTATGACCACCGCCGGTGCCTATTTTCGCGAT       |
| K127/129A_R | GCCATCGCGAAAATAGGCACCGGCGGTGGTCATACC       |
